# Supplementary material for: Disease-associated mitochondrial mutations and the evolution of primate mitogenomes
Source: PLoS One. 2017 May 16;12(5):e0177403. doi: 10.1371/journal.pone.0177403 (PMC5433710; doi:10.1371/journal.pone.0177403)
Supplement: S1 Table — (XLSX) [file pone.0177403.s005.xlsx]

## Sheet: Planilha1
Accesion number	Mitogenome identification (GenBank)	Size (bp)	Species	Genus	Subfamily	Family	Parvorder	Infraorder	Suborder
NC_026088	Megaladapis edwardsi mitochondrion, complete genome	16781	†Megaladapis edwardsi	†Megaladapis		†Megaladapidae		Lemuriformes	Strepsirrhini
NC_026090	Palaeopropithecus ingens mitochondrion, complete genome	16910	Palaeopropithecus ingens	Palaeopropithecus		†Palaeopropithecidae		Lemuriformes	Strepsirrhini
NC_021945	Cheirogaleus medius mitochondrion, complete genome	16804	Cheirogaleus medius	Cheirogaleus		Cheirogaleidae		Lemuriformes	Strepsirrhini
NC_028718	Microcebus murinus isolate 920FAG mitochondrion, complete genome	17114	Microcebus murinus	Microcebus		Cheirogaleidae		Lemuriformes	Strepsirrhini
NC_010299	Daubentonia madagascariensis mitochondrion, complete genome	16620	Daubentonia madagascariensis	Daubentonia		Daubentoniidae		Lemuriformes	Strepsirrhini
NC_021940	Avahi laniger mitochondrion, complete genome	16787	Avahi laniger	Avahi		Indriidae		Lemuriformes	Strepsirrhini
NC_026095	Indri indri isolate TANDRA4.18 mitochondrion, complete genome	17098	Indri indri	Indri		Indriidae		Lemuriformes	Strepsirrhini
NC_011053	Propithecus coquereli mitochondrion, complete genome	17104	Propithecus coquereli	Propithecus		Indriidae		Lemuriformes	Strepsirrhini
NC_026084	Propithecus diadema isolate ANJZ5 mitochondrion, complete genome	17084	Propithecus diadema	Propithecus		Indriidae		Lemuriformes	Strepsirrhini
NC_026086	Propithecus edwardsi isolate FAN4.3 mitochondrion, complete genome	17100	Propithecus edwardsi	Propithecus		Indriidae		Lemuriformes	Strepsirrhini
NC_027740	Propithecus tattersalli mitochondrion, complete genome	17099	Propithecus tattersalli	Propithecus		Indriidae		Lemuriformes	Strepsirrhini
NC_028210	Propithecus verreauxi mitochondrion, complete genome	17106	Propithecus verreauxi	Propithecus		Indriidae		Lemuriformes	Strepsirrhini
NC_012766	Eulemur fulvus fulvus mitochondrion, complete genome	17126	Eulemur fulvus	Eulemur		Lemuridae		Lemuriformes	Strepsirrhini
NC_012769	Eulemur fulvus mayottensis mitochondrion, complete genome	17118	Eulemur fulvus	Eulemur		Lemuridae		Lemuriformes	Strepsirrhini
NC_012771	Eulemur macaco macaco mitochondrion, complete genome	17149	Eulemur macaco	Eulemur		Lemuridae		Lemuriformes	Strepsirrhini
NC_010300	Eulemur mongoz mitochondrion, complete genome	16686	Eulemur mongoz	Eulemur		Lemuridae		Lemuriformes	Strepsirrhini
NC_026098	Eulemur rubriventer isolate TRA216 mitochondrion, complete genome	17534	Eulemur rubriventer	Eulemur		Lemuridae		Lemuriformes	Strepsirrhini
NC_021948	Eulemur rufus mitochondrion, complete genome	16280	Eulemur rufus	Eulemur		Lemuridae		Lemuriformes	Strepsirrhini
NC_021950	Hapalemur griseus mitochondrion, complete genome	16878	Hapalemur griseus	Hapalemur		Lemuridae		Lemuriformes	Strepsirrhini
NC_004025	Lemur catta mitochondrion, complete genome	17036	Lemur catta	Lemur		Lemuridae		Lemuriformes	Strepsirrhini
NC_014453	Lepilemur hubbardorum mitochondrion, complete genome	16854	Lepilemur hubbardorum	Lepilemur		Lemuridae		Lemuriformes	Strepsirrhini
NC_021953	Lepilemur ruficaudatus mitochondrion, complete genome	16936	Lepilemur ruficaudatus	Lepilemur		Lemuridae		Lemuriformes	Strepsirrhini
NC_021959	Prolemur simus mitochondrion, complete genome	16765	Prolemur simus	Prolemur		Lemuridae		Lemuriformes	Strepsirrhini
NC_026085	Varecia variegata isolate ANOSIB7 mitochondrion, complete genome	17051	Varecia variegata	Varecia		Lemuridae		Lemuriformes	Strepsirrhini
NC_012773	Varecia variegata variegata mitochondrion, complete genome	16965	Varecia variegata	Varecia		Lemuridae		Lemuriformes	Strepsirrhini
NC_021949	Galago moholi mitochondrion, complete genome	16650	Galago moholi	Galago		Galagidae		Lorisiformes	Strepsirrhini
NC_012761	Galago senegalensis mitochondrion, complete genome	16795	Galago senegalensis	Galago		Galagidae		Lorisiformes	Strepsirrhini
NC_012762	Otolemur crassicaudatus mitochondrion, complete genome	16827	Otolemur crassicaudatus	Otolemur		Galagidae		Lorisiformes	Strepsirrhini
NC_021955	Loris lydekkerianus mitochondrion, complete genome	16791	Loris lydekkerianus	Loris	Lorinae	Lorisidae		Lorisiformes	Strepsirrhini
NC_012763	Loris tardigradus mitochondrion, complete genome	16776	Loris tardigradus	Loris	Lorinae	Lorisidae		Lorisiformes	Strepsirrhini
NC_021958	Nycticebus bengalensis mitochondrion, complete genome	16735	Nycticebus bengalensis	Nycticebus	Lorinae	Lorisidae		Lorisiformes	Strepsirrhini
NC_002765	Nycticebus coucang mitochondrion, complete genome	16764	Nycticebus coucang	Nycticebus	Lorinae	Lorisidae		Lorisiformes	Strepsirrhini
NC_012764	Perodicticus potto mitochondrion, complete genome	16638	Perodicticus potto	Perodicticus	Perodicticinae	Lorisidae		Lorisiformes	Strepsirrhini
NC_012774	Tarsius syrichta mitochondrion, complete genome	17004	Carlito syrichta	Carlito		Tarsiidae		Tarsiiformes	Haplorhini
NC_002811	Tarsius bancanus mitochondrion, complete genome	16927	Cephalopachus bancanus	Cephalopachus		Tarsiidae		Tarsiiformes	Haplorhini
NC_024052	Tarsius dentatus voucher SM10 mitochondrion, complete genome	16965	Tarsius dentatus	Tarsius		Tarsiidae		Tarsiiformes	Haplorhini
NC_024051	Tarsius lariang voucher SM14 mitochondrion, complete genome	16965	Tarsius lariang	Tarsius		Tarsiidae		Tarsiiformes	Haplorhini
NC_024053	Tarsius wallacei voucher SM27 mitochondrion, complete genome	16957	Tarsius wallacei	Tarsius		Tarsiidae		Tarsiiformes	Haplorhini
NC_023965	Allenopithecus nigroviridis mitochondrion, complete genome	16517	Allenopithecus nigroviridis	Allenopithecus	Cercopithecinae	Cercopithecidae	Catarrhini	Simiiformes	Haplorhini
NC_028592	Cercocebus atys mitochondrion, complete genome	16543	Cercocebus atys	Cercocebus	Cercopithecinae	Cercopithecidae	Catarrhini	Simiiformes	Haplorhini
NC_021943	Cercocebus chrysogaster mitochondrion, complete genome	16551	Cercocebus chrysogaster	Cercocebus	Cercopithecinae	Cercopithecidae	Catarrhini	Simiiformes	Haplorhini
NC_023964	Cercocebus torquatus mitochondrion, complete genome	16542	Cercocebus torquatus	Cercocebus	Cercopithecinae	Cercopithecidae	Catarrhini	Simiiformes	Haplorhini
NC_021944	Cercopithecus albogularis mitochondrion, complete genome	16544	Cercopithecus albogularis	Cercopithecus	Cercopithecinae	Cercopithecidae	Catarrhini	Simiiformes	Haplorhini
NC_023963	Cercopithecus diana mitochondrion, complete genome	16505	Cercopithecus diana	Cercopithecus	Cercopithecinae	Cercopithecidae	Catarrhini	Simiiformes	Haplorhini
NC_023962	Cercopithecus lhoesti mitochondrion, complete genome	16518	Cercopithecus lhoesti	Cercopithecus	Cercopithecinae	Cercopithecidae	Catarrhini	Simiiformes	Haplorhini
NC_023961	Cercopithecus mitis mitochondrion, complete genome	16512	Cercopithecus mitis	Cercopithecus	Cercopithecinae	Cercopithecidae	Catarrhini	Simiiformes	Haplorhini
NC_007009	Chlorocebus aethiops mitochondrion, complete genome	16389	Chlorocebus aethiops	Chlorocebus	Cercopithecinae	Cercopithecidae	Catarrhini	Simiiformes	Haplorhini
NC_024933	Chlorocebus cynosuros mitochondrion, complete genome	16334	Chlorocebus cynosuros	Chlorocebus	Cercopithecinae	Cercopithecidae	Catarrhini	Simiiformes	Haplorhini
NC_009747	Chlorocebus pygerythrus mitochondrion, complete genome	16343	Chlorocebus pygerythrus	Chlorocebus	Cercopithecinae	Cercopithecidae	Catarrhini	Simiiformes	Haplorhini
NC_008066	Chlorocebus sabaeus mitochondrion, complete genome	16550	Chlorocebus sabaeus	Chlorocebus	Cercopithecinae	Cercopithecidae	Catarrhini	Simiiformes	Haplorhini
NC_009748	Chlorocebus tantalus mitochondrion, complete genome	16368	Chlorocebus tantalus	Chlorocebus	Cercopithecinae	Cercopithecidae	Catarrhini	Simiiformes	Haplorhini
NC_021947	Erythrocebus patas mitochondrion, complete genome	16676	Erythrocebus patas	Erythrocebus	Cercopithecinae	Cercopithecidae	Catarrhini	Simiiformes	Haplorhini
NC_021954	Lophocebus aterrimus mitochondrion, complete genome	16563	Lophocebus aterrimus	Lophocebus	Cercopithecinae	Cercopithecidae	Catarrhini	Simiiformes	Haplorhini
NC_025201	Macaca arctoides mitochondrion, complete genome	16558	Macaca arctoides	Macaca	Cercopithecinae	Cercopithecidae	Catarrhini	Simiiformes	Haplorhini
NC_023795	Macaca assamensis mitochondrion, complete genome	16542	Macaca assamensis	Macaca	Cercopithecinae	Cercopithecidae	Catarrhini	Simiiformes	Haplorhini
NC_027449	Macaca cyclopis isolate Mc-mitogm12060805 mitochondrion, complete genome	16563	Macaca cyclopis	Macaca	Cercopithecinae	Cercopithecidae	Catarrhini	Simiiformes	Haplorhini
NC_012670	Macaca fascicularis mitochondrion, complete genome	16575	Macaca fascicularis	Macaca	Cercopithecinae	Cercopithecidae	Catarrhini	Simiiformes	Haplorhini
NC_025513	Macaca fuscata mitochondrion, complete genome	16565	Macaca fuscata	Macaca	Cercopithecinae	Cercopithecidae	Catarrhini	Simiiformes	Haplorhini
NC_027604	Macaca leonina mitochondrion, complete genome	17050	Macaca leonina	Macaca	Cercopithecinae	Cercopithecidae	Catarrhini	Simiiformes	Haplorhini
NC_031156	Macaca leucogenys mitochondrion, complete genome	16565	Macaca leucogenys	Macaca	Cercopithecinae	Cercopithecidae	Catarrhini	Simiiformes	Haplorhini
NC_005943	Macaca mulatta mitochondrion, complete genome	16564	Macaca mulatta	Macaca	Cercopithecinae	Cercopithecidae	Catarrhini	Simiiformes	Haplorhini
NC_026976	Macaca nemestrina mitochondrion, complete genome	16560	Macaca nemestrina	Macaca	Cercopithecinae	Cercopithecidae	Catarrhini	Simiiformes	Haplorhini
NC_026120	Macaca nigra mitochondrion, complete genome	16564	Macaca nigra	Macaca	Cercopithecinae	Cercopithecidae	Catarrhini	Simiiformes	Haplorhini
NC_025221	Macaca silenus mitochondrion, complete genome	16541	Macaca silenus	Macaca	Cercopithecinae	Cercopithecidae	Catarrhini	Simiiformes	Haplorhini
NC_002764	Macaca sylvanus mitochondrion, complete genome	16586	Macaca sylvanus	Macaca	Cercopithecinae	Cercopithecidae	Catarrhini	Simiiformes	Haplorhini
NC_011519	Macaca thibetana mitochondrion, complete genome	16540	Macaca thibetana	Macaca	Cercopithecinae	Cercopithecidae	Catarrhini	Simiiformes	Haplorhini
NC_025222	Macaca tonkeana mitochondrion, complete genome	16560	Macaca tonkeana	Macaca	Cercopithecinae	Cercopithecidae	Catarrhini	Simiiformes	Haplorhini
NC_028442	Mandrillus leucophaeus mitochondrion, complete genome	16547	Mandrillus leucophaeus	Mandrillus	Cercopithecinae	Cercopithecidae	Catarrhini	Simiiformes	Haplorhini
NC_021956	Mandrillus sphinx mitochondrion, complete genome	16546	Mandrillus sphinx	Mandrillus	Cercopithecinae	Cercopithecidae	Catarrhini	Simiiformes	Haplorhini
NC_019583	Trachypithecus johnii mitochondrion, complete genome	16544	Semnopithecus johnii	Semnopithecus	Cercopithecinae	Cercopithecidae	Catarrhini	Simiiformes	Haplorhini
NC_019582	Trachypithecus vetulus mitochondrion, complete genome	16554	Semnopithecus vetulus	Semnopithecus	Cercopithecinae	Cercopithecidae	Catarrhini	Simiiformes	Haplorhini
NC_019802	Theropithecus gelada mitochondrion, complete genome	16546	Theropithecus gelada	Theropithecus	Cercopithecinae	Cercopithecidae	Catarrhini	Simiiformes	Haplorhini
NC_023971	Trachypithecus cristatus mitochondrion, complete genome	16557	Trachypithecus cristatus	Trachypithecus	Cercopithecinae	Cercopithecidae	Catarrhini	Simiiformes	Haplorhini
NC_023970	Trachypithecus francoisi mitochondrion, complete genome	16554	Trachypithecus francoisi	Trachypithecus	Cercopithecinae	Cercopithecidae	Catarrhini	Simiiformes	Haplorhini
NC_019580	Trachypithecus germaini mitochondrion, complete genome	16552	Trachypithecus germaini	Trachypithecus	Cercopithecinae	Cercopithecidae	Catarrhini	Simiiformes	Haplorhini
NC_019579	Trachypithecus hatinhensis mitochondrion, complete genome	16547	Trachypithecus hatinhensis	Trachypithecus	Cercopithecinae	Cercopithecidae	Catarrhini	Simiiformes	Haplorhini
NC_006900	Trachypithecus obscurus mitochondrion, complete genome	16560	Trachypithecus obscurus	Trachypithecus	Cercopithecinae	Cercopithecidae	Catarrhini	Simiiformes	Haplorhini
NC_024529	Trachypithecus pileatus mitochondrion, complete genome	16526	Trachypithecus pileatus	Trachypithecus	Cercopithecinae	Cercopithecidae	Catarrhini	Simiiformes	Haplorhini
NC_019581	Trachypithecus shortridgei mitochondrion, complete genome	16529	Trachypithecus shortridgei	Trachypithecus	Cercopithecinae	Cercopithecidae	Catarrhini	Simiiformes	Haplorhini
NC_006901	Colobus guereza mitochondrion, complete genome	16648	Colobus guereza	Colobus	Colobinae	Cercopithecidae	Catarrhini	Simiiformes	Haplorhini
NC_008216	Nasalis larvatus mitochondrion, complete genome	16570	Nasalis larvatus	Nasalis	Colobinae	Cercopithecidae	Catarrhini	Simiiformes	Haplorhini
NC_020006.2	Papio anubis isolate east mitochondrion, complete genome	16516	Papio anubis	Papio	Colobinae	Cercopithecidae	Catarrhini	Simiiformes	Haplorhini
NC_020007.2	Papio cynocephalus isolate north mitochondrion, complete genome	16515	Papio cynocephalus	Papio	Colobinae	Cercopithecidae	Catarrhini	Simiiformes	Haplorhini
NC_001992	Papio hamadryas mitochondrion, complete genome	16521	Papio hamadryas	Papio	Colobinae	Cercopithecidae	Catarrhini	Simiiformes	Haplorhini
NC_020008.2	Papio kindae mitochondrion, complete genome	16504	Papio kindae	Papio	Colobinae	Cercopithecidae	Catarrhini	Simiiformes	Haplorhini
NC_020009.2	Papio papio mitochondrion, complete genome	16505	Papio papio	Papio	Colobinae	Cercopithecidae	Catarrhini	Simiiformes	Haplorhini
NC_020010.2	Papio ursinus isolate north mitochondrion, complete genome	16496	Papio ursinus	Papio	Colobinae	Cercopithecidae	Catarrhini	Simiiformes	Haplorhini
NC_008219	Piliocolobus badius mitochondrion, complete genome	16595	Piliocolobus badius	Piliocolobus	Colobinae	Cercopithecidae	Catarrhini	Simiiformes	Haplorhini
NC_008217	Presbytis melalophos mitochondrion, complete genome	16543	Presbytis melalophos	Presbytis	Colobinae	Cercopithecidae	Catarrhini	Simiiformes	Haplorhini
NC_020666	Procolobus verus mitochondrion, complete genome	16605	Procolobus verus	Procolobus	Colobinae	Cercopithecidae	Catarrhini	Simiiformes	Haplorhini
NC_018062	Pygathrix cinerea 1 RL-2012 mitochondrion, complete genome	16535	Pygathrix cinerea	Pygathrix	Colobinae	Cercopithecidae	Catarrhini	Simiiformes	Haplorhini
NC_018063	Pygathrix cinerea 2 RL-2012 mitochondrion, complete genome	16535	Pygathrix cinerea	Pygathrix	Colobinae	Cercopithecidae	Catarrhini	Simiiformes	Haplorhini
NC_008220	Pygathrix nemaeus mitochondrion, complete genome	15467	Pygathrix nemaeus	Pygathrix	Colobinae	Cercopithecidae	Catarrhini	Simiiformes	Haplorhini
NC_018061	Pygathrix nigripes mitochondrion, complete genome	16536	Pygathrix nigripes	Pygathrix	Colobinae	Cercopithecidae	Catarrhini	Simiiformes	Haplorhini
NC_015485	Rhinopithecus avunculus mitochondrion, complete genome	16548	Rhinopithecus avunculus	Rhinopithecus	Colobinae	Cercopithecidae	Catarrhini	Simiiformes	Haplorhini
NC_018058	Rhinopithecus bieti 1 RL-2012 mitochondrion, complete genome	16550	Rhinopithecus bieti	Rhinopithecus	Colobinae	Cercopithecidae	Catarrhini	Simiiformes	Haplorhini
NC_015486	Rhinopithecus bieti mitochondrion, complete genome	16551	Rhinopithecus bieti	Rhinopithecus	Colobinae	Cercopithecidae	Catarrhini	Simiiformes	Haplorhini
NC_018057	Rhinopithecus brelichi mitochondrion, complete genome	16553	Rhinopithecus brelichi	Rhinopithecus	Colobinae	Cercopithecidae	Catarrhini	Simiiformes	Haplorhini
NC_008218	Rhinopithecus roxellana mitochondrion, complete genome	16549	Rhinopithecus roxellana	Rhinopithecus	Colobinae	Cercopithecidae	Catarrhini	Simiiformes	Haplorhini
NC_018059	Rhinopithecus strykeri mitochondrion, complete genome	16550	Rhinopithecus strykeri	Rhinopithecus	Colobinae	Cercopithecidae	Catarrhini	Simiiformes	Haplorhini
NC_008215	Semnopithecus entellus mitochondrion, complete genome	16532	Semnopithecus entellus	Semnopithecus	Colobinae	Cercopithecidae	Catarrhini	Simiiformes	Haplorhini
NC_020667	Simias concolor mitochondrion, complete genome	16561	Simias concolor	Simias	Colobinae	Cercopithecidae	Catarrhini	Simiiformes	Haplorhini
NC_011120	Gorilla gorilla gorilla mitochondrion, complete genome	16412	Gorilla gorilla	Gorilla	Homininae	Hominidae	Catarrhini	Simiiformes	Haplorhini
NC_001645	Gorilla gorilla mitochondrion, complete genome	16364	Gorilla gorilla	Gorilla	Homininae	Hominidae	Catarrhini	Simiiformes	Haplorhini
NC_023100	Homo heidelbergensis mitochondrion, complete genome	16568	Homo heidelbergensis	Homo	Homininae	Hominidae	Catarrhini	Simiiformes	Haplorhini
NC_012920	Homo sapiens mitochondrion, complete genome	16569	Homo sapiens	Homo	Homininae	Hominidae	Catarrhini	Simiiformes	Haplorhini
NC_011137	Homo sapiens neanderthalensis mitochondrion, complete genome	16565	Homo sapiens	Homo	Homininae	Hominidae	Catarrhini	Simiiformes	Haplorhini
NC_013993	Homo sp Altai mitochondrion, complete genome	16570	Homo sp. (from Denisova)	Homo	Homininae	Hominidae	Catarrhini	Simiiformes	Haplorhini
NC_001644	Pan paniscus mitochondrion, complete genome	16563	Pan paniscus	Pan	Homininae	Hominidae	Catarrhini	Simiiformes	Haplorhini
NC_001643	Pan troglodytes mitochondrion, complete genome	16554	Pan troglodytes	Pan	Homininae	Hominidae	Catarrhini	Simiiformes	Haplorhini
NC_002083	Pongo abelii mitochondrion, complete genome	16499	Pongo abelii	Pongo	Ponginae	Hominidae	Catarrhini	Simiiformes	Haplorhini
NC_001646	Pongo pygmaeus mitochondrion, complete genome	16389	Pongo pygmaeus	Pongo	Ponginae	Hominidae	Catarrhini	Simiiformes	Haplorhini
NC_014042	Hylobates agilis mitochondrion, complete genome	16500	Hylobates agilis	Hylobates		Hylobatidae	Catarrhini	Simiiformes	Haplorhini
NC_002082	Hylobates lar mitochondrion, complete genome	16472	Hylobates lar	Hylobates		Hylobatidae	Catarrhini	Simiiformes	Haplorhini
NC_014045	Hylobates pileatus mitochondrion, complete genome	16502	Hylobates pileatus	Hylobates		Hylobatidae	Catarrhini	Simiiformes	Haplorhini
NC_018753	Nomascus gabriellae mitochondrion, complete genome	16478	Nomascus gabriellae	Nomascus		Hylobatidae	Catarrhini	Simiiformes	Haplorhini
NC_021957	Nomascus leucogenys mitochondrion, complete genome	16478	Nomascus leucogenys	Nomascus		Hylobatidae	Catarrhini	Simiiformes	Haplorhini
NC_014051	Nomascus siki mitochondrion, complete genome	16476	Nomascus siki	Nomascus		Hylobatidae	Catarrhini	Simiiformes	Haplorhini
NC_014047	Symphalangus syndactylus mitochondrion, complete genome	16516	Symphalangus syndactylus	Symphalangus		Hylobatidae	Catarrhini	Simiiformes	Haplorhini
NC_021938	Alouatta caraya mitochondrion, complete genome	16517	Alouatta caraya	Alouatta	Alouattinae	Atelidae	Platyrrhini	Simiiformes	Haplorhini
NC_027825	Alouatta seniculus mitochondrion, complete genome	16557	Alouatta seniculus	Alouatta	Alouattinae	Atelidae	Platyrrhini	Simiiformes	Haplorhini
NC_019800	Ateles belzebuth mitochondrion, complete genome	16560	Ateles belzebuth	Ateles	Atelinae	Atelidae	Platyrrhini	Simiiformes	Haplorhini
NC_021951	Lagothrix lagotricha mitochondrion, complete genome	16595	Lagothrix lagotricha	Lagothrix	Atelinae	Atelidae	Platyrrhini	Simiiformes	Haplorhini
NC_018115	Aotus azarai azarai mitochondrion, complete genome	16585	Aotus azarai	Aotus	Aotinae	Cebidae	Platyrrhini	Simiiformes	Haplorhini
NC_021939	Aotus azarai mitochondrion, complete genome	16555	Aotus azarai	Aotus	Aotinae	Cebidae	Platyrrhini	Simiiformes	Haplorhini
NC_019799	Aotus lemurinus mitochondrion, complete genome	16580	Aotus lemurinus	Aotus	Aotinae	Cebidae	Platyrrhini	Simiiformes	Haplorhini
NC_018116	Aotus nancymaae mitochondrion, complete genome	16469	Aotus nancymaae	Aotus	Aotinae	Cebidae	Platyrrhini	Simiiformes	Haplorhini
NC_024628	Callimico goeldii mitochondrion, complete genome	16523	Callimico goeldii	Callimico	Callitrichinae	Cebidae	Platyrrhini	Simiiformes	Haplorhini
NC_021941	Callithrix geoffroyi mitochondrion, complete genome	16502	Callithrix geoffroyi	Callithrix	Callitrichinae	Cebidae	Platyrrhini	Simiiformes	Haplorhini
NC_025586	Callithrix jacchus mitochondrion, complete genome	16499	Callithrix jacchus	Callithrix	Callitrichinae	Cebidae	Platyrrhini	Simiiformes	Haplorhini
NC_027658	Callithrix kuhlii mitochondrion, complete genome	16500	Callithrix kuhlii	Callithrix	Callitrichinae	Cebidae	Platyrrhini	Simiiformes	Haplorhini
NC_030788	Callithrix penicillata isolate cpe001 mitochondrion, complete genome	16246	Callithrix penicillata	Callithrix	Callitrichinae	Cebidae	Platyrrhini	Simiiformes	Haplorhini
NC_021942	Callithrix pygmaea mitochondrion, complete genome	16520	Callithrix pygmaea	Callithrix	Callitrichinae	Cebidae	Platyrrhini	Simiiformes	Haplorhini
NC_021952	Leontopithecus rosalia mitochondrion, complete genome	16872	Leontopithecus rosalia	Leontopithecus	Callitrichinae	Cebidae	Platyrrhini	Simiiformes	Haplorhini
NC_002763	Cebus albifrons mitochondrion, complete genome	16554	Cebus albifrons	Cebus	Cebinae	Cebidae	Platyrrhini	Simiiformes	Haplorhini
NC_021961	Cebus xanthosternos mitochondrion, complete genome	16527	Cebus xanthosternos	Cebus	Cebinae	Cebidae	Platyrrhini	Simiiformes	Haplorhini
NC_021960	Saguinus oedipus mitochondrion, complete genome	16551	Saguinus oedipus	Saguinus	Saimirinae	Cebidae	Platyrrhini	Simiiformes	Haplorhini
NC_018096	Saimiri boliviensis boliviensis mitochondrion, complete genome	16473	Saimiri boliviensis	Saimiri	Saimirinae	Cebidae	Platyrrhini	Simiiformes	Haplorhini
NC_021966	Saimiri boliviensis mitochondrion, complete genome	16471	Saimiri boliviensis	Saimiri	Saimirinae	Cebidae	Platyrrhini	Simiiformes	Haplorhini
NC_023211	Saimiri oerstedii citrinellus mitochondrion, complete genome	16472	Saimiri oerstedii	Saimiri	Saimirinae	Cebidae	Platyrrhini	Simiiformes	Haplorhini
NC_012775	Saimiri sciureus mitochondrion, complete genome	16474	Saimiri sciureus	Saimiri	Saimirinae	Cebidae	Platyrrhini	Simiiformes	Haplorhini
NC_021965	Callicebus cupreus mitochondrion, complete genome	16551	Callicebus cupreus	Callicebus	Callicebinae	Pitheciidae	Platyrrhini	Simiiformes	Haplorhini
NC_019801	Callicebus donacophilus mitochondrion, complete genome	16563	Callicebus donacophilus	Callicebus	Callicebinae	Pitheciidae	Platyrrhini	Simiiformes	Haplorhini
NC_024630	Callicebus lugens mitochondrion, complete genome	16689	Callicebus lugens	Callicebus	Callicebinae	Pitheciidae	Platyrrhini	Simiiformes	Haplorhini
NC_021967	Cacajao calvus mitochondrion, complete genome	16702	Cacajao calvus	Cacajao	Pitheciinae	Pitheciidae	Platyrrhini	Simiiformes	Haplorhini
NC_021946	Chiropotes albinasus mitochondrion, complete genome	16706	Chiropotes albinasus	Chiropotes	Pitheciinae	Pitheciidae	Platyrrhini	Simiiformes	Haplorhini
NC_024629	Chiropotes israelita mitochondrion, complete genome	16670	Chiropotes israelita	Chiropotes	Pitheciinae	Pitheciidae	Platyrrhini	Simiiformes	Haplorhini
